# Supplementary material
Source: publisher site journal article supplement (https://www.dovepress.com/article/394044)
Supplement: Supplementary file 1 [file get_supplementary_file.php]

**Supplementary Material**

Supplementary Table 1: Supplemental Injury Data: this demonstrates further breakdown of each selectable option within the survey

|  | All injuries  N=1104 (%) | Self-reported mild  n=284 (26%) | Self-reported moderate/severe  n=820 (74%) |
| --- | --- | --- | --- |
| Body region  Head/Neck  Upper limb   - Shoulder - Elbow - Wrist - Hand   Upper Back/Thorax  Lower Back  Upper leg   - Hip - Thigh - Groin - Buttock - Hamstring   Knee  Lower leg   - Calf - Achilles - Tibia   Ankle/Foot  Other | 25 (2.3)  116 (10.5)   - 54 (4.9) - 2 (0.2) - 49 (4.4) - 11 (1.0)   31 (2.8)  213 (19.3)  271 (24.6)   - 83 (7.5) - 13 (1.2) - 34 (3.1) - 11 (1.0) - 130 (11.8)   159 (14.4)  23 (2.1)   - 13 (1.2) - 6 (0.5) - 4 (0.4)   252 (22.8)  14 (1.3) | 14 (4.9)  30 (10.6)   - 12 (4.2) - 1 (0.4) - 13 (4.6) - 4 (1.4)   4 (1.4)  40 (14.1)  61 (21.5)   - 13 (4.6) - 4 (1.4) - 10 (3.5) - 2 (0.7) - 32 (11.3)   41 (14.4)  3 (1.1)   - 2 (0.7) - 0 (0.0) - 1 (0.4)   88 (31.0)  3 (1.1) | 11 (1.3)  86 (10.5)   - 42 (5.1) - 1 (0.1) - 36 (4.4) - 7 (0.9)   27 (3.3)  173 (21.1)  210 (25.6)   - 70 (8.5) - 9 (1.1) - 24 (2.9) - 9 (1.1) - 98 (12.0)   118 (14.4)  20 (2.4)   - 11 (1.3) - 6 (0.7) - 3 (0.4)   164 (20.0)  11 (1.3) |
| Diagnosis  Sprain/strain   - Muscular - Ligamentous   Bone pathology   - Fracture inc stress fracture - Dislocation/subluxation   Tendonitis/Tendinopathy  Bruise or laceration/cut  Impingement  Bursitis  Concussion  Unsure  Other   - Disc - Cartilage - Ganglion injuries - Osgood-schlatter - Anterior Knee Syndromes - Other | 622 (56.3)   - 405 (36.7) - 217 (19.7)   187 (16.9)   - 117 (10.6) - 70 (6.3)   81 (7.3)  39 (3.5)  42 (3.8)  54 (4.9)  5 (0.5)  157 (14.2)  119 (10.8)   - 17 (1.5) - 18 (1.6) - 8 (0.7) - 4 (0.4) - 3 (0.3) - 69 (6.3) | 159 (56.0)   - 145 (51.1) - 14 (4.9)   20 (7.0)   - 12 (4.2) - 8 (2.8)   22 (7.8)  27 (9.5)  1 (0.4)  9 (3.2)  2 (0.7)  57 (20.1)  15 (5.3)   - 1 (0.4) - 0 (0.0) - 3 (1.1) - 0 (0.0) - 0 (0.0) - 11 (3.9) | 463 (56.5)   - 260 (31.7) - 203 (24.8)   167 (20.4)   - 105 (12.8) - 62 (7.6)   59 (7.2)  12 (1.5)  41 (5.0)  45 (5.5)  3 (0.4)  100 (12.2)  104 (12.7)   - 6 (2.0) - 18 (2.2) - 5 (0.6) - 4 (0.5) - 3 (0.4) - 58 (7.1) |
| Risk Factors  Environmental Factors   - Flooring - Stage/Prop related - Other environmental (Cold/Dust/Temp etc.)   Preparation   - Not stretched enough - Not enough warmed - Cooled down then rapid return to work - Strength related   Overuse   - Too many repetitions - Too many hours - Overstretching   Skills-based   - New/challenging movement - Partner work - Technique related   Coach/Supervision Factors   - Not adequate supervision - Coach related   Accident/Landing injuries   - Accident - Landing   Intrinsic Factors   - Age - Other intrinsic factors   Other   - Other - Competition mental performance factors - Fatigue | 232 (21.0)   - 198 (17.9) - 20 (1.8) - 14 (1.3)   617 (55.9)   - 234 (21.2) - 141 (12.8) - 199 (18.0) - 43 (3.9)   737 (66.8)   - 485 (43.9) - 241 (21.8) - 11 (1.0)   161 (14.6)   - 136 (12.3) - 9 (0.8) - 16 (1.4)   49 (4.4)   - 35 (3.2) - 14 (1.3)   75 (6.8)   - 48 (4.3) - 27 (2.4)   35 (3.2)   - 21 (1.9) - 14 (1.3)   133 (12.1)   - 122 (11.1) - 5 (0.5) - 6 (0.5) | 72 (25.4)   - 62 (21.8) - 6 (2.1) - 4 (1.4)   150 (52.8)   - 66 (23.2) - 34 (12.0) - 46 (16.2) - 4 (1.4)   182 (64.1)   - 121 (42.6) - 60 (21.1) - 1 (0.4)   42 (14.8)   - 38 (13.4) - 2 (0.7) - 2 (0.7)   9 (3.2)   - 7 (2.5) - 2 (0.7)   17 (6.0)   - 8 (2.8) - 9 (3.2)   3 (1.1)   - 1 (0.4) - 2 (0.7)   21 (7.4)   - 19 (6.7) - 1 (0.4) - 1 (0.4) | 160 (19.5)   - 136 (16.6) - 14 (1.7) - 10 (1.2)   467 (56.7)   - 168 (20.5) - 107 (13.0) - 153 (18.7) - 39 (4.8)   555 (67.7)   - 364 (44.4) - 181 (22.1) - 10 (1.2)   119 (14.5)   - 98 (12.0) - 7 (0.9) - 14 (1.7)   40 (4.9)   - 28 (3.4) - 12 (1.5)   58 (7.1)   - 40 (4.9) - 18 (2.2)   32 (3.9)   - 20 (2.4) - 12 (1.5)   112 (13.7)   - 103 (12.6) - 4 (0.5) - 5 (0.6) |

Supplementary Table 2: Demographics of participants

|  | All responses n=543 Mean (SD) or n(%) |
| --- | --- |
| Age, *years* | 23.4 (9.9) |
| State  Victoria  New South Wales  Queensland  South Australia  Western Australia  Australian Capital Territory  Northern Territory  New Zealand | 324 (59.7%)  1 (0.2%)  19 (3.5%)  112 (20.6%)  46 (8.5%)  35 (6.5%)  6 (1.1%)  0 (0%) |
| Current performer  Retired performer | 407 (75.0%)  136 (25.1%) |
| Age group last competed in  Tinies (7 years and under)  Sub Juniors (7 - 10 years)  Juniors (10 - 13 years)  Intermediates (13 - 17 years)  Seniors (18 years and over)  Masters (26 years and over) | 4 (0.7%)  6 (1.1%)  39 (7.2%)  110 (20.3%)  317 (58.4%)  67 (12.3%) |
| Competing division  Championship/Championship Reserve  Division 1 - 10 including Recreational  Not Applicable | 257 (47.3%)  249 (45.9%)  37 (6.8%) |
| Number of year/s participating | 15.8 (7.8) |
| Calisthenics participation type*  Team training/competition  Solo training/competition  Skills levels training/performance  Medals program  State team training/nationals competition  Flexibility/technique/strength class run independently of team training | 539 (99.3%)  399 (73.5%)  375 (69.1%)  54 (9.9%)  193 (35.5%)  201 (37.0%) |
| Right side dominance  Leg  Arm | 309 (56.9%)  434 (79.9%) |
| Number of injuries recalled | 4.5 (3.3) |
| Years since injury | 7.3 (6.9) |
| Age at time of injury | 17.4 (7.4) |

*Note: participants were able to select multiple options for this question, therefore %=Number/Total participants 543

Supplementary Table 3: Calisthenics skills causing injury: supplemental data of text responses stating a specific calisthenics skill that caused a participant’s injury, these are the responses where <10 of the same responses were stated

| **Name of movement** | **Number of responses** |
| --- | --- |
| Partner | 9 |
| Arabesque | 7 |
| Cradle | 7 |
| Pull through | 6 |
| Valdez | 6 |
| Rotating | 5 |
| Flip | 4 |
| Squat | 4 |
| Lunge | 3 |
| Demi | 3 |
| Club | 3 |
| Cartwheel | 3 |
| Aerial | 3 |
| Needle | 3 |
| March | 2 |
| Shoulder roll | 2 |
| Layout | 2 |
| Rotation | 1 |

**Appendix A – Calisthenics Injury Survey**

Start of Block: Default Question Block

Q1 **Calisthenics Survey**   
  
 _____________________________________________________________________________

**What does my participation involve?** This is a survey to investigate the current demographics, injury patterns and values within the sport of calisthenics.
   
 You are invited to take part in this research as either a current/former participant in the sport, or the parent or guardian of a current/former participant. We are interested in every participant in Australia/New Zealand being part of this study across all sections and age groups. Your responses are essential for this research to achieve its aims.  

 **What is the purpose of this research?**
 Detailed information about injury patterns and their risk factors are essential for the improvement of our sport and to help us target programs at injury prevention and recognition. Exploration of these factors has not been undertaken in this detail since 2003 when the last calisthenics injury survey was performed. In this time the sport has changed dramatically and up to date information is the foundation we can use to help participants be happier and healthier.
   The information that you provide in the study will be used to:
 -Identify current injury patterns -Identify risk factors for those injury patterns -Identify attitudes and values important to participants -Help us target interventions around injury prevention and management
  
 This research is being undertaken by researchers at Austin Health (Dr. Laura McDonald-Wedding MBBS (Hons)), Monash University (A/Prof Cylie Williams, Lauren Goodwin, Annabel Preston), and in private practice (Dr. Gaylene McKay, Sports physiotherapist, PhD). Dr. McDonald-Wedding, Ms. Goodwin and Ms. Preston are also ACF Level 1 Coaches. _________________________________________________________________ 

 **What do you have to do to be part of this research?**
 You are being asked to complete an online survey. This survey will take up to 20 minutes. You can complete it in your own time and it is important that the whole survey is completed. 
  
 **What are the possible benefits of taking part?**
 It is not expected that you will directly benefit from this research and there is no payment for being part of this research. 
 **What are the possible risks of taking part?**
 There are no forseeable risks other than inconveniance of your time taken to complete the survey.

 **What happens to information about you?.**
 There is no indentifable information collected as part of the survey. At the end of the survey will you will invited to leave a first name and email if you wish to have a summary of the findings. If you choose to leave your contact details to receive results, you can be assured that your contact details will not be subsequently linked to your survey responses. Your details will be collected in a separate survey that will open at the end of the survey completion.   
 **What is I withdraw from this research project?**
 You can withdraw at any time by closing your Internet browser window. Being part of this study is voluntary. However, if you do consent and answer questions, anything you have answered may be used within the research. You will not be able to withdraw the answers to any questions you have answered. 

  ____________________________________________________________
  
 **What will happen to information about you.**
 The results of this survey are confidential. You will not be asked to give any identifying information in a way that your results can be matched to you. Answers are being collected through Qualtrics and you can access the privacy policy here: https://www.qualtrics.com/privacy-statement/
  
 **Who will access your information**
 Any provided information and details (in separate survey) will only be viewed by the research team. The collected responses will be stored in accordance with Australian Privacy Regulations, and will be kept as a password protected data file stored on a cloud based server for 5 years. A report of this study will be submitted for publication. No individual responses will be identified in any publications.

 **Who is funding this research?**
 No funding has been received for this research other than the wages of the researchers. 
 **Who has revieved this research project**
 This research has been approved by Monash University Human Research Ethics (MUHREC) represented by ethics number application 23859.
 _________________________________________________________________
  
 **Further information and who to contact**
 If you would like to contact the research team about aspects of this study, please contact the principal investigator: 
  
 Cylie Williams:  cylie.williams@monash.edu
 Ph: (03) 9784 2678
  
 OR
  
 Should you have any concerns or complaints about the conduct of the project, you are welcome to contact: 


 Executive Officer, Monash University Human Research Ethics (MUHREC)  Room 111, Chancellery Building E, 24 Sports Walk, Clayton Campus  Research Office, Monash University    Tel: +61 3 9905 2052              Email: muhrec@monash.edu                    Fax: +61 3 9905 3831

2 If you are under 16 years of age,  you must ask your parent/guardian to complete this survey with you on your behalf.


If you are the parent/guardian of a participant, we ask that you talk with your child about this survey and answer from their perspective as best as possible.


If you are a master and are also the parent/guardian of a participant, we encourage you to complete the survey twice - once for yourself, and once on behalf of your child.

Consent I consent to take part in this survey on behalf of myself, or as the parent/guardian of a child less than 16 years of age

- Yes (1)

| Page Break |  |
| --- | --- |

Completing **Calisthenics Demographics**

Q5 Are you completing this survey on behalf of yourself or a child/dependent?

- Myself (1)
- Child/Dependent (2)

| Page Break |  |
| --- | --- |

Display This Question:

If Are you completing this survey on behalf of yourself or a child/dependent? = Myself

| 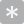 |
| --- |

Age Your age?

________________________________________________________________

Display This Question:

If Are you completing this survey on behalf of yourself or a child/dependent? = Child/Dependent

| 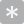 |
| --- |

ChildAge Your child's age?

________________________________________________________________

Gender Gender?

- Female (1)
- Male (2)
- Prefer to describe (3) ________________________________________________
- Prefer not to say (4)

State Which State/Territory/Country have you performed/trained for the majority of the time?

- Victoria (72)
- New South Wales (73)
- Queensland (74)
- South Australia (75)
- Western Australia (76)
- Australian Capital Territory (77)
- Northern Territory (78)
- New Zealand (79)

Perf_cat Current performer or retired?

- Current (1)
- Retired (2)

Section Which was the section/age group last competed or participated in?

- Tinies (7 years and under) (1)
- Sub Juniors (7 - 10 years) (2)
- Juniors (10 - 13 years) (3)
- Intermediates (13 - 17 years) (4)
- Seniors (18 years and over) (5)
- Masters (26 years and over) (6)

Currency Please select either the current competing division or the division most frequently competed in.

- Championship (1)
- Championship Reserve (2)
- Division 1 (3)
- Division 2 (4)
- Division 3 (5)
- Division 4 (6)
- Division 5 (7)
- Division 6 (8)
- Division 7 (9)
- Division 8 (10)
- Division 9 (11)
- Division 10 (12)
- Recreational (13)
- Not Applicable (14)

| 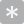 |
| --- |

Years Total number of year/s participating in calisthenics?

________________________________________________________________

Part_type Calisthenics participation type? Select all that apply.

- Team training/competition (48)
- Solo training/competition (49)
- Skills levels training/performance (50)
- Medals program (51)
- State team training/nationals competition (52)
- Flexibility/technique/strength class run independently of team training (53)

Dom_leg Preferred/predominant leg?

- Right (31)
- Left (32)
- Unsure/Both/Neither (33)
- Other (please specify) (34) ________________________________________________

Dom_arm Preferred/predominant arm? i.e. which hand to write with or use to perform a one-handed skill?

- Right (12)
- Left (13)
- Unsure/Both/Neither (14)
- Other (please specify) (15) ________________________________________________

| Page Break |  |
| --- | --- |

1 To answer the following questions, please base your answers on experiences from PRIOR TO COVID-19, social distancing measures and cancellation of formal calisthenics classes/competitions. 


(If you would like to do so, there will be an opportunity at the end of the survey to give a response based on the current social situation.)

| Page Break |  |
| --- | --- |

| 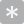 |
| --- |

H_Cal On average, how many HOURS per week are you/is your child participating in calisthenics, excluding home practice? 
If retired, please specify how many hours per week were spent when training most. (Number only)

________________________________________________________________

| 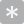 |
| --- |

H_Home On average, how many HOURS per week are you/is your child participating in home practice of calisthenics? 
If retired, please specify how many hours per week were spent when training most. (Number only)

________________________________________________________________

H_Oth On average, how many HOURS per week are you/is your child participating in other dance or sports activities whilst training in calisthenics?
If retired, please specify on average how many hours per week was spent when training most. (Number only)

________________________________________________________________

| 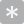 |
| --- |

H_St On average, how many HOURS per week is dedicated to STRETCHING? 
If retired, please specify on average many hours per week were dedicated when training most. (Number only)

________________________________________________________________

| 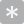 |
| --- |

H_Card On average, how much time in HOURS per week is dedicated to CARDIOVASCULAR FITNESS? (e.g. running, cycling, swimming)

If retired, please specify on average how many hours per week were dedicated when training most. (Number only)

________________________________________________________________

H_SC On average, how much time in HOURS per week is dedicated to STRENGTH and CONDITIONING training? e.g. resistance workout, lifting weights.
If retired, please specify on average how many hours per week were dedicated when training most. (Number only)

________________________________________________________________

Value Specify how much value you put on the following activities while competing/participating in calisthenics.

|  | Do not value (1) | Somewhat value (2) | Moderately value (3) | Highly value (4) |
| --- | --- | --- | --- | --- |
| Stretching (29) |  |  |  |  |
| Cardiovascular fitness (30) |  |  |  |  |
| Strength and Conditioning (31) |  |  |  |  |

Man_Strat What is/are your preferred injury management strategy/strategies?

- Stretching (1)
- Massage/manual therapy from a practitioner (2)
- Self-administered massage/manual therapy e.g. spiky ball/roller (3)
- Ice (4)
- Heat (5)
- Medication (6)
- Taping/Bracing (7)
- Strength and Conditioning (8)
- Other (please specify) (9) ________________________________________________

| Page Break |  |
| --- | --- |

2 **Injury in Calisthenics**
 
An injury is an incident in which a participant/competitor has perceived bodily harm to have been sustained.

Display This Question:

If Are you completing this survey on behalf of yourself or a child/dependent? = Myself

I1 Have you experienced an injury during calisthenics?

- Yes (1)
- No (2)

Display This Question:

If Are you completing this survey on behalf of yourself or a child/dependent? = Child/Dependent

I1c Has your child experienced an injury during calisthenics?

- Yes (1)
- No (2)

Display This Question:

If Have you experienced an injury during calisthenics? = Yes

Or Has your child experienced an injury during calisthenics? = Yes

I_N How many different injuries can be recalled during calisthenics? (If greater than 20, please put 20)

|  | 0 | 2 | 4 | 6 | 8 | 10 | 12 | 14 | 16 | 18 | 20 |
| --- | --- | --- | --- | --- | --- | --- | --- | --- | --- | --- | --- |

| Number of injuries 0 to >20 () | 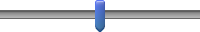 |
| --- | --- |

Display This Question:

If How many different injuries can be recalled during calisthenics? (If greater than 20, please put 20) [ Number of injuries 0 to >20 ] > 0

3 We are interested in hearing more about your/your child's serious injuries. Questions will be displayed based on the number of injuries you/your child have experienced. You will be asked to respond based on individual injuries, to a maximum of 3 injuries. Please think of the worst injuries that have impacted upon you/your child the most or were the most significant for you/your child.

| Page Break |  |
| --- | --- |

Display This Question:

If How many different injuries can be recalled during calisthenics? (If greater than 20, please put 20) [ Number of injuries 0 to >20 ] > 0

4 Injury 1 - The most serious injury recalled

Display This Question:

If How many different injuries can be recalled during calisthenics? (If greater than 20, please put 20) [ Number of injuries 0 to >20 ] > 0

| 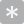 |
| --- |

I1_Yr What year did this injury occur?

________________________________________________________________

Display This Question:

If How many different injuries can be recalled during calisthenics? (If greater than 20, please put 20) [ Number of injuries 0 to >20 ] > 0

I1_body In which body part was injured?

- Head (89)
- Neck (90)
- Shoulder (91)
- Elbow (92)
- Wrist (93)
- Hand (94)
- Hip (95)
- Knee (96)
- Ankle (97)
- Foot (98)
- Calf (99)
- Thigh/Quadricep (100)
- Hamstring (101)
- Groin (102)
- Buttock/Gluteal region (103)
- Upper back (thoracic/cervical regions) (104)
- Lower back (lumbar region) (105)
- Other (please specify) (106) ________________________________________________

Display This Question:

If How many different injuries can be recalled during calisthenics? (If greater than 20, please put 20) [ Number of injuries 0 to >20 ] > 0

I1_side Which side of the body was injured?

- Right (1)
- Left (2)
- Central/Midline (3)
- Both sides (4)
- Other (please specify) (5) ________________________________________________

Display This Question:

If How many different injuries can be recalled during calisthenics? (If greater than 20, please put 20) [ Number of injuries 0 to >20 ] > 0

I1_perc Perception of how this injury occurred?

- New acute injury/incident (1)
- Gradual onset or overuse (2)
- Exacerbation/recurrence (3)
- Other (please specify) (4) ________________________________________________

Display This Question:

If How many different injuries can be recalled during calisthenics? (If greater than 20, please put 20) [ Number of injuries 0 to >20 ] > 0

I1_nat What was the type of injury or nature of the injury?

- Sprain/strain (1)
- Fracture (2)
- Dislocation (3)
- Tendonitis/Tendinopathy (4)
- Bruise or lacteration/cut (5)
- Impingement (6)
- Bursitis (7)
- Ligament tear/rupture (8)
- Unsure (9)
- Other (please specify) (10) ________________________________________________

Display This Question:

If How many different injuries can be recalled during calisthenics? (If greater than 20, please put 20) [ Number of injuries 0 to >20 ] > 0

I1_where Where did this injury occur? 

Or if gradual onset/unsure then select the location or type of training which provoked the injury.

- Team training (normal local club) (556)
- Team competition (557)
- Solo training (558)
- Solo competition (559)
- State team training (560)
- Camp training (with either your local club or state team camp) (561)
- Nationals week (562)
- Levels or Medals training/performance (563)
- Flexibility/Technique/Strength class run independently of team training (564)
- Independent practice (565)
- Other (please specify) (566) ________________________________________________

Display This Question:

If How many different injuries can be recalled during calisthenics? (If greater than 20, please put 20) [ Number of injuries 0 to >20 ] > 0

I1_act What activity/calisthenics move resulted in the injury? 
Or if gradual onset/unsure then select the activity which provoked the injury.

- Landing or taking off with elevated work (46)
- Stretching (47)
- Apparatus injury (48)
- Prop or stage element injury (49)
- Collision injury (50)
- Overuse (51)
- Calisthenics Skill/Move (please specify) (52) ________________________________________________
- Trying to learn a new challenging skill (please specify the skill) (53) ________________________________________________

Display This Question:

If How many different injuries can be recalled during calisthenics? (If greater than 20, please put 20) [ Number of injuries 0 to >20 ] > 0

I1_time At what time of year did this injury occur? Can select multiple if participating in both solo and team training at the time of injury (select all that apply)

- Off season - no formal training or classes (49)
- Solo season (50)
- Early team training classes - first 6 weeks of training for the year (51)
- Pre-team competition season - any time from 7th week to first competition (52)
- Team competition season (53)
- State team training/competition season (54)
- Unsure (55)
- Other (please specify) (56) ________________________________________________

Display This Question:

If How many different injuries can be recalled during calisthenics? (If greater than 20, please put 20) [ Number of injuries 0 to >20 ] > 0

I1_sev What was the severity of the injury sustained?

- Minimal interference with performance. No professional treatment necessary. No training or competitions missed. No change in choregraphy required (1)
- Required modification to training/choreography or required some form of professional treatment or missed a class or classes of calisthenics (2)

Display This Question:

If How many different injuries can be recalled during calisthenics? (If greater than 20, please put 20) [ Number of injuries 0 to >20 ] > 0

And What was the severity of the injury sustained? = Required modification to training/choreography or required some form of professional treatment or missed a class or classes of calisthenics

I1_week How many weeks total did you miss calisthenics? (Slide to 0 if nothing or 21 if you withdrew for the year after sustaining the injury)

|  | 0 | 1 | 2 | 3 | 4 | 5 | 6 | 7 | 8 | 9 | 10 | 11 | 12 | 13 | 14 | 15 | 16 | 17 | 18 | 19 | 20 | 21 |
| --- | --- | --- | --- | --- | --- | --- | --- | --- | --- | --- | --- | --- | --- | --- | --- | --- | --- | --- | --- | --- | --- | --- |

| Total weeks missed () | 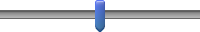 |
| --- | --- |

Display This Question:

If How many different injuries can be recalled during calisthenics? (If greater than 20, please put 20) [ Number of injuries 0 to >20 ] > 0

And What was the severity of the injury sustained? = Required modification to training/choreography or required some form of professional treatment or missed a class or classes of calisthenics

I1_mod At the time of your injury, how much, if any, time in weeks did you need modified training or choreography?

|  | 0 | 1 | 2 | 3 | 4 | 5 | 6 | 7 | 8 | 9 | 10 | 11 | 12 | 13 | 14 | 15 | 16 | 17 | 18 | 19 | 20 |
| --- | --- | --- | --- | --- | --- | --- | --- | --- | --- | --- | --- | --- | --- | --- | --- | --- | --- | --- | --- | --- | --- |

| Weeks of modified training () | 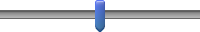 |
| --- | --- |

Display This Question:

If How many different injuries can be recalled during calisthenics? (If greater than 20, please put 20) [ Number of injuries 0 to >20 ] > 0

And What was the severity of the injury sustained? = Required modification to training/choreography or required some form of professional treatment or missed a class or classes of calisthenics

I1_cons Who did you consult for advice about your injury? (Select all that apply)

- Coach (49)
- Physiotherapist (50)
- General Practitioner/GP/Family Doctor (51)
- Medical specialist - Sports Physician/Orthopaedic Surgeon (52)
- Podiatrist (53)
- Chiropractor (54)
- Osteopath (55)
- Massage therapist/Myotherapist (56)
- Other (please specify) (58) ________________________________________________

Display This Question:

If How many different injuries can be recalled during calisthenics? (If greater than 20, please put 20) [ Number of injuries 0 to >20 ] > 0

And What was the severity of the injury sustained? = Required modification to training/choreography or required some form of professional treatment or missed a class or classes of calisthenics

I1_sess How many sessions/appointments were required for management of this injury?

|  | 0 | 2 | 4 | 6 | 9 | 11 | 13 | 15 | 17 | 19 | 21 | 24 | 26 | 28 | 30 |
| --- | --- | --- | --- | --- | --- | --- | --- | --- | --- | --- | --- | --- | --- | --- | --- |

| Total number of appointments () | 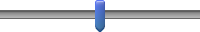 |
| --- | --- |

Display This Question:

If How many different injuries can be recalled during calisthenics? (If greater than 20, please put 20) [ Number of injuries 0 to >20 ] > 0

And How many weeks total did you miss calisthenics? (Slide to 0 if nothing or 21 if you withdrew for... [ Total weeks missed ] > 0

I1_acc How accepting did you feel your coach/coaches were of you taking time off?

- Not accepting (2)
- Somewhat accepting (3)
- Moderately accepting (4)
- Very accepting (5)
- Unsure (6)
- Other (please specify) (7) ________________________________________________

Display This Question:

If How many different injuries can be recalled during calisthenics? (If greater than 20, please put 20) [ Number of injuries 0 to >20 ] > 0

I1_cont What did you feel contributed to the injury? (Select all that may apply)

- Training floors being too hard (1)
- Did not stretch enough (2)
- Was not given enough warm up time (3)
- Cooled down and then rapidly returned to calisthenics movements (4)
- Too many repetitions of a movement (5)
- Did a movement that was new or too challenging for me (6)
- Doing too many hours of calisthenics or other sports/dance (7)
- Felt not adequately supervised for a movement (8)
- Other (please specify) (9) ________________________________________________

| Page Break |  |
| --- | --- |

Display This Question:

If How many different injuries can be recalled during calisthenics? (If greater than 20, please put 20) [ Number of injuries 0 to >20 ] > 1

5 Injury 2 - The second most serious injury recalled

Display This Question:

If How many different injuries can be recalled during calisthenics? (If greater than 20, please put 20) [ Number of injuries 0 to >20 ] > 1

I2_Yr What year did this injury occur?

________________________________________________________________

Display This Question:

If How many different injuries can be recalled during calisthenics? (If greater than 20, please put 20) [ Number of injuries 0 to >20 ] > 1

I2_body In which body part was injured?

- Head (18)
- Neck (19)
- Shoulder (20)
- Elbow (21)
- Wrist (22)
- Hand (23)
- Hip (24)
- Knee (25)
- Ankle (26)
- Foot (27)
- Calf (28)
- Thigh/Quadricep (29)
- Hamstring (30)
- Groin (31)
- Buttock/Gluteal region (32)
- Upper back (thoracic/cervical regions) (33)
- Lower back (lumbar region) (34)
- Other (please specify) (35) ________________________________________________

Display This Question:

If How many different injuries can be recalled during calisthenics? (If greater than 20, please put 20) [ Number of injuries 0 to >20 ] > 1

I2_side Which side of the body was injured?

- Right (1)
- Left (2)
- Central/Midline (3)
- Both sides (4)
- Other (please specify) (5) ________________________________________________

Display This Question:

If How many different injuries can be recalled during calisthenics? (If greater than 20, please put 20) [ Number of injuries 0 to >20 ] > 1

I2_perc Perception of how this injury occurred?

- New acute injury/incident (1)
- Gradual onset or overuse (2)
- Exacerbation/recurrence (3)
- Other (please specify) (4) ________________________________________________

Display This Question:

If How many different injuries can be recalled during calisthenics? (If greater than 20, please put 20) [ Number of injuries 0 to >20 ] > 1

I2_nat What was the type of injury or nature of the injury?

- Sprain/strain (1)
- Fracture (2)
- Dislocation (3)
- Tendonitis/Tendinopathy (4)
- Bruise or lacteration/cut (5)
- Impingement (6)
- Bursitis (7)
- Ligament tear/rupture (8)
- Unsure (9)
- Other (please specify) (10) ________________________________________________

Display This Question:

If How many different injuries can be recalled during calisthenics? (If greater than 20, please put 20) [ Number of injuries 0 to >20 ] > 1

I2_where Where did this injury occur? 

Or if gradual onset/unsure then select the location or type of training which provoked the injury.

- Team training (normal local club) (20)
- Team competition (21)
- Solo training (22)
- Solo competition (23)
- State team training (24)
- Camp training (with either your local club or state team camp) (25)
- Nationals week (26)
- Levels or Medals training/performance (27)
- Flexibility/Technique/Strength class run independently of team training (28)
- Independent practice (29)
- Other (please specify) (30) ________________________________________________

Display This Question:

If How many different injuries can be recalled during calisthenics? (If greater than 20, please put 20) [ Number of injuries 0 to >20 ] > 1

I2_act What activity/calisthenics move resulted in the injury? 
Or if gradual onset/unsure then select the activity which provoked the injury.

- Landing or taking off with elevated work (9)
- Stretching (10)
- Apparatus injury (11)
- Prop or stage element injury (12)
- Collision injury (13)
- Overuse (14)
- Calisthenics Skill/Move (please specify) (15) ________________________________________________
- Trying to learn a new challenging skill (please specify the skill) (16) ________________________________________________

Display This Question:

If How many different injuries can be recalled during calisthenics? (If greater than 20, please put 20) [ Number of injuries 0 to >20 ] > 1

I2_time At what time of year did this injury occur? Can select multiple if participating in both solo and team training at the time of injury (select all that apply)

- Off season - no formal training or classes (8)
- Solo season (9)
- Early team training classes - first 6 weeks of training for the year (10)
- Pre-team competition season - any time from 7th week to first competition (11)
- Team competition season (12)
- State team training/competition season (13)
- Unsure (14)
- Other (please specify) (15) ________________________________________________

Display This Question:

If How many different injuries can be recalled during calisthenics? (If greater than 20, please put 20) [ Number of injuries 0 to >20 ] > 1

I2_sev What was the severity of the injury sustained?

- Minimal interference with performance. No professional treatment necessary. No training or competitions missed. No change in choregraphy required (1)
- Required modification to training/choreography or required some form of professional treatment or missed a class or classes of calisthenics (2)

Display This Question:

If How many different injuries can be recalled during calisthenics? (If greater than 20, please put 20) [ Number of injuries 0 to >20 ] > 1

And What was the severity of the injury sustained? = Required modification to training/choreography or required some form of professional treatment or missed a class or classes of calisthenics

I2_week How many weeks total did you miss calisthenics? (Slide to 0 if nothing or 21 if you withdrew for the year after sustaining the injury)

|  | 0 | 1 | 2 | 3 | 4 | 5 | 6 | 7 | 8 | 9 | 10 | 11 | 12 | 13 | 14 | 15 | 16 | 17 | 18 | 19 | 20 | 21 |
| --- | --- | --- | --- | --- | --- | --- | --- | --- | --- | --- | --- | --- | --- | --- | --- | --- | --- | --- | --- | --- | --- | --- |

| Week missed () | 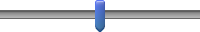 |
| --- | --- |

Display This Question:

If How many different injuries can be recalled during calisthenics? (If greater than 20, please put 20) [ Number of injuries 0 to >20 ] > 1

And What was the severity of the injury sustained? = Required modification to training/choreography or required some form of professional treatment or missed a class or classes of calisthenics

I2_mod At the time of your injury, how much, if any, time in weeks did you need modified training or choreography?

|  | 0 | 1 | 2 | 3 | 4 | 5 | 6 | 7 | 8 | 9 | 10 | 11 | 12 | 13 | 14 | 15 | 16 | 17 | 18 | 19 | 20 |
| --- | --- | --- | --- | --- | --- | --- | --- | --- | --- | --- | --- | --- | --- | --- | --- | --- | --- | --- | --- | --- | --- |

| Weeks of modified training () | 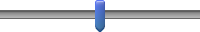 |
| --- | --- |

Display This Question:

If How many different injuries can be recalled during calisthenics? (If greater than 20, please put 20) [ Number of injuries 0 to >20 ] > 1

And What was the severity of the injury sustained? = Required modification to training/choreography or required some form of professional treatment or missed a class or classes of calisthenics

I2_cons Who did you consult for advice about your injury? (Select all that apply)

- Coach (49)
- Physiotherapist (50)
- General Practitioner/GP/Family Doctor (51)
- Medical specialist - Sports Physician/Orthopaedic Surgeon (52)
- Podiatrist (53)
- Chiropractor (54)
- Osteopath (55)
- Massage therapist/Myotherapist (56)
- Other (please specify) (58) ________________________________________________

Display This Question:

If How many different injuries can be recalled during calisthenics? (If greater than 20, please put 20) [ Number of injuries 0 to >20 ] > 1

And What was the severity of the injury sustained? = Required modification to training/choreography or required some form of professional treatment or missed a class or classes of calisthenics

I2_sess How many sessions/appointments were required for management of this injury?

|  | 0 | 2 | 4 | 6 | 8 | 10 | 12 | 14 | 16 | 18 | 20 | 22 | 24 | 26 | 28 | 30 |
| --- | --- | --- | --- | --- | --- | --- | --- | --- | --- | --- | --- | --- | --- | --- | --- | --- |

| Total number of appointments () | 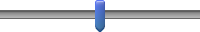 |
| --- | --- |

Display This Question:

If How many different injuries can be recalled during calisthenics? (If greater than 20, please put 20) [ Number of injuries 0 to >20 ] > 1

And What was the severity of the injury sustained? = Required modification to training/choreography or required some form of professional treatment or missed a class or classes of calisthenics

I2_acc How accepting did you feel your coach/coaches were of you taking time off?

- Not accepting (2)
- Somewhat accepting (3)
- Moderately accepting (4)
- Very accepting (5)
- Unsure (6)
- Other (please specify) (7) ________________________________________________

Display This Question:

If How many different injuries can be recalled during calisthenics? (If greater than 20, please put 20) [ Number of injuries 0 to >20 ] > 1

I2_cont What did you feel contributed to the injury? (Select all that may apply)

- Training floors being too hard (1)
- Did not stretch enough (2)
- Was not given enough warm up time (3)
- Cooled down and then rapidly returned to calisthenics movements (4)
- Too many repetitions of a movement (5)
- Did a movement that was new or too challenging for me (6)
- Doing too many hours of calisthenics or other sports/dance (7)
- Felt not adequately supervised for a movement (8)
- Other (please specify) (9) ________________________________________________

| Page Break |  |
| --- | --- |

Display This Question:

If How many different injuries can be recalled during calisthenics? (If greater than 20, please put 20) [ Number of injuries 0 to >20 ] > 2

6 Injury 3 - The third most serious injury recalled

Display This Question:

If How many different injuries can be recalled during calisthenics? (If greater than 20, please put 20) [ Number of injuries 0 to >20 ] > 2

I3_yr What year did this injury occur?

________________________________________________________________

Display This Question:

If How many different injuries can be recalled during calisthenics? (If greater than 20, please put 20) [ Number of injuries 0 to >20 ] > 2

I3_body In which body part was injured?

- Head (18)
- Neck (19)
- Shoulder (20)
- Elbow (21)
- Wrist (22)
- Hand (23)
- Hip (24)
- Knee (25)
- Ankle (26)
- Foot (27)
- Calf (28)
- Thigh/Quadricep (29)
- Hamstring (30)
- Groin (31)
- Buttock/Gluteal region (32)
- Upper back (thoracic/cervical regions) (33)
- Lower back (lumbar region) (34)
- Other (please specify) (35) ________________________________________________

Display This Question:

If How many different injuries can be recalled during calisthenics? (If greater than 20, please put 20) [ Number of injuries 0 to >20 ] > 2

I3_side Which side of the body was injured?

- Right (1)
- Left (2)
- Central/Midline (3)
- Both sides (4)
- Other (please specify) (5) ________________________________________________

Display This Question:

If How many different injuries can be recalled during calisthenics? (If greater than 20, please put 20) [ Number of injuries 0 to >20 ] > 2

I3_perc Perception of how this injury occurred?

- New acute injury/incident (1)
- Gradual onset or overuse (2)
- Exacerbation/recurrence (3)
- Other (please specify) (4) ________________________________________________

Display This Question:

If How many different injuries can be recalled during calisthenics? (If greater than 20, please put 20) [ Number of injuries 0 to >20 ] > 2

I3_nat What was the type of injury or nature of the injury?

- Sprain/strain (1)
- Fracture (2)
- Dislocation (3)
- Tendonitis/Tendinopathy (4)
- Bruise or lacteration/cut (5)
- Impingement (6)
- Bursitis (7)
- Ligament tear/rupture (8)
- Unsure (9)
- Other (please specify) (10) ________________________________________________

Display This Question:

If How many different injuries can be recalled during calisthenics? (If greater than 20, please put 20) [ Number of injuries 0 to >20 ] > 2

I3_where Where did this injury occur? 

Or if gradual onset/unsure then select the location or type of training which provoked the injury.

- Team training (normal local club) (20)
- Team competition (21)
- Solo training (22)
- Solo competition (23)
- State team training (24)
- Camp training (with either your local club or state team camp) (25)
- Nationals week (26)
- Levels or Medals training/performance (27)
- Flexibility/Technique/Strength class run independently of team training (28)
- Independent practice (29)
- Other (please specify) (30) ________________________________________________

Display This Question:

If How many different injuries can be recalled during calisthenics? (If greater than 20, please put 20) [ Number of injuries 0 to >20 ] > 2

I3_act What activity/calisthenics move resulted in the injury? Or if gradual onset/unsure then select the activity which provoked the injury.

- Landing or taking off with elevated work (9)
- Stretching (10)
- Apparatus injury (11)
- Prop or stage element injury (12)
- Collision injury (13)
- Overuse (14)
- Calisthenics Skill/Move (please specify) (15) ________________________________________________
- Trying to learn a new challenging skill (please specify the skill) (16) ________________________________________________

Display This Question:

If How many different injuries can be recalled during calisthenics? (If greater than 20, please put 20) [ Number of injuries 0 to >20 ] > 2

I3_time At what time of year did this injury occur? Can select multiple if participating in both solo and team training at the time of injury (select all that apply)

- Off season - no formal training or classes (8)
- Solo season (9)
- Early team training classes - first 6 weeks of training for the year (10)
- Pre-team competition season - any time from 7th week to first competition (11)
- Team competition season (12)
- State team training/competition season (13)
- Unsure (14)
- Other (please specify) (15) ________________________________________________

Display This Question:

If How many different injuries can be recalled during calisthenics? (If greater than 20, please put 20) [ Number of injuries 0 to >20 ] > 2

I3_sev What was the severity of the injury sustained?

- Minimal interference with performance. No professional treatment necessary. No training or competitions missed. No change in choregraphy required (1)
- Required modification to training/choreography or required some form of professional treatment or missed a class or classes of calisthenics (2)

Display This Question:

If How many different injuries can be recalled during calisthenics? (If greater than 20, please put 20) [ Number of injuries 0 to >20 ] > 2

And What was the severity of the injury sustained? = Required modification to training/choreography or required some form of professional treatment or missed a class or classes of calisthenics

I3_week How many weeks total did you miss calisthenics? (Slide to 0 if nothing or 21 if you withdrew for the year after sustaining the injury)

|  | 0 | 1 | 2 | 3 | 4 | 5 | 6 | 7 | 8 | 9 | 10 | 11 | 12 | 13 | 14 | 15 | 16 | 17 | 18 | 19 | 20 | 21 |
| --- | --- | --- | --- | --- | --- | --- | --- | --- | --- | --- | --- | --- | --- | --- | --- | --- | --- | --- | --- | --- | --- | --- |

| Weeks missed () | 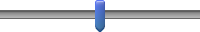 |
| --- | --- |

Display This Question:

If How many different injuries can be recalled during calisthenics? (If greater than 20, please put 20) [ Number of injuries 0 to >20 ] > 2

And What was the severity of the injury sustained? = Required modification to training/choreography or required some form of professional treatment or missed a class or classes of calisthenics

I3_mod At the time of your injury, how much, if any, time in weeks did you need modified training or choreography?

|  | 0 | 1 | 2 | 3 | 4 | 5 | 6 | 7 | 8 | 9 | 10 | 11 | 12 | 13 | 14 | 15 | 16 | 17 | 18 | 19 | 20 |
| --- | --- | --- | --- | --- | --- | --- | --- | --- | --- | --- | --- | --- | --- | --- | --- | --- | --- | --- | --- | --- | --- |

| Weeks () | 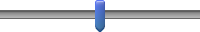 |
| --- | --- |

Display This Question:

If How many different injuries can be recalled during calisthenics? (If greater than 20, please put 20) [ Number of injuries 0 to >20 ] > 2

And What was the severity of the injury sustained? = Required modification to training/choreography or required some form of professional treatment or missed a class or classes of calisthenics

I3_cons Who did you consult for advice about your injury? (Select all that apply)

- Coach (49)
- Physiotherapist (50)
- General Practitioner/GP/Family doctor (51)
- Medical specialist - Sports physician/Orthopaedic Surgeon (52)
- Podiatrist (53)
- Chiropractor (54)
- Osteopath (55)
- Massage therapist/Myotherapist (56)
- Other (please specify) (58) ________________________________________________

Display This Question:

If How many different injuries can be recalled during calisthenics? (If greater than 20, please put 20) [ Number of injuries 0 to >20 ] > 2

And What was the severity of the injury sustained? = Required modification to training/choreography or required some form of professional treatment or missed a class or classes of calisthenics

I3_sess How many sessions/appointments were required for this injury?

|  | 0 | 2 | 4 | 6 | 8 | 10 | 12 | 14 | 16 | 18 | 20 | 22 | 24 | 26 | 28 | 30 |
| --- | --- | --- | --- | --- | --- | --- | --- | --- | --- | --- | --- | --- | --- | --- | --- | --- |

| Total number of appointments () | 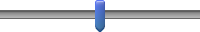 |
| --- | --- |

Display This Question:

If How many different injuries can be recalled during calisthenics? (If greater than 20, please put 20) [ Number of injuries 0 to >20 ] > 2

And What was the severity of the injury sustained? = Required modification to training/choreography or required some form of professional treatment or missed a class or classes of calisthenics

I3_acc How accepting did you feel your coach/coaches were of you taking time off?

- Not accepting (2)
- Somewhat accepting (3)
- Moderately accepting (4)
- Very accepting (5)
- Unsure (6)
- Other (please specify) (7) ________________________________________________

Display This Question:

If How many different injuries can be recalled during calisthenics? (If greater than 20, please put 20) [ Number of injuries 0 to >20 ] > 2

I3_perc Perception of injury contributions? (Select all that may apply)

- Training floors being too hard (1)
- Did not stretch enough (2)
- Was not given enough warm up time (3)
- Cooled down and then rapidly returned to calisthenics movements (4)
- Too many repetitions of a movement (5)
- Did a movement that was new or too challenging for me (6)
- Doing too many hours of calisthenics or other sports/dance (7)
- Felt not adequately supervised for a movement (8)
- Other (please specify) (9) ________________________________________________

| Page Break |  |
| --- | --- |

Display This Question:

If How many different injuries can be recalled during calisthenics? (If greater than 20, please put 20) [ Number of injuries 0 to >20 ] = 1

Or How many different injuries can be recalled during calisthenics? (If greater than 20, please put 20) [ Number of injuries 0 to >20 ] = 2

Or How many different injuries can be recalled during calisthenics? (If greater than 20, please put 20) [ Number of injuries 0 to >20 ] = 3

Comment If there are any comments about the injury/injuries which have not already been previously answered, please state below and provide details about which injury it was relating to.

________________________________________________________________

| Page Break |  |
| --- | --- |

Display This Question:

If Current performer or retired? = Retired

ret_I Was your/your child's reason for retiring from calisthenics mostly related to injury?

- Yes (1)
- No (2)
- Other (please specify) (3) ________________________________________________

Display This Question:

If Current performer or retired? = Retired

And Was your/your child's reason for retiring from calisthenics mostly related to injury? = Yes

ret_Injury Which body part(s) were involved in this injury? 
(Select all that apply)

- Head (92)
- Neck (93)
- Shoulder (94)
- Elbow (95)
- Wrist (96)
- Hand (97)
- Hip (98)
- Knee (99)
- Ankle (100)
- Foot (101)
- Calf (102)
- Thigh/Quadricep (103)
- Hamstring (104)
- Groin (105)
- Buttock/Gluteal region (106)
- Upper back (thoracic/cervical regions) (107)
- Lower back (lumbar region) (108)
- Other (please specify) (109) ________________________________________________

Display This Question:

If Current performer or retired? = Retired

ret_reas List calisthenic retirement reasons? (Select all that apply)

- Too much training commitment (1)
- Cost/Expenses (2)
- Costume making (3)
- Injury (4)
- Felt too old (5)
- Wanted to continue but did not have a local team available (6)
- Other work commitments interfered (7)
- Wanted to do a different sport/dance (8)
- Other (please specify) (9) ________________________________________________

Display This Question:

If Current performer or retired? = Retired

And Was your/your child's reason for retiring from calisthenics mostly related to injury? = Yes

ret_impact Does any injury you/your child sustained during calisthenics currently impact on your/their life?

- Yes - please specify how (2) ________________________________________________
- No (3)
- Unsure (4)

| Page Break |  |
| --- | --- |

Covid Please tell us about any of your modifications to participation and training since social distancing measures have been put in place with COVID-19

________________________________________________________________

End of Block: Default Question Block

**Appendix B – CHERRIES Checklist**

| Item Category | Checklist Item | Explanation |
| --- | --- | --- |
| Design | Describe survey design | Calisthenics participants current and retired were the target population. A convenience sample of participants was used. |
| IRB (Institutional Review Board) approval and informed consent process | IRB approval | The study received ethics approval from Monash University Human Resarch Ethics (MUHREC). Ethics application number: 23859. |
| Informed consent | Participants gave informed consent via the first page of the survey which included information regarding the aim of the survey, the investigators, the type of questions, the approximate duration, the data storage and privacy arrangements, and confidentiality. Participants could then select to participate or voluntarily exit the survey at any time. |
| Data protection | No personal or identifying information was collected. The survey data was stored according to the Qualtrics privacy statement and the data will be stored for a maximum of five years on a cloud-based server with access only to the investigators. |
| Development and pre-testing | Development and testing | Questions were developed based on researchers’ experience, evidence available in similar sporting genres and through pilot survey development with 3 current or retired calisthenics performers |
| Recruitment process and description of the sample having access to the questionnaire | Open survey versus closed survey | The survey was an open survey format where anyone with the link could access it. |
| Contact mode | All contact from the investigators was via the internet, with social media and emails being the prime contact medium. Snowball sampling via social media and word of mouth was also used to further expand participants. |
| Advertising the survey | The survey was advertised on social media platforms with pictures/banners/gifs. Each calisthenics state organisation was emailed with these to share on their social media or email to their contact lists. Social media pages with a focus on calisthenics were also contacted and given the information and media samples, which they could voluntarily share on their respective pages. |
| Survey administration | Web/E-mail | The survey was a web-based survey – by clicking on the link a potential participant would be taken to the Qualtrics website where the survey would take place.  The web pages where the survey was posted for contact of potential participants were social media pages e.g. Facebook, Instagram, Twitter, LinkedIn |
| Context | The Websites used for advertising were social media platforms. Given social media is less extensively used by an older age group, it is possible that a portion of retired or calisthenics master’s participants may be less representative in the sample. |
| Mandatory/voluntary | The survey was voluntary in nature, both to select the survey and also for informed consent on the first page of the survey. |
| Incentives | No direct incentives were offered to participate in this survey. Participants were offered the opportunity at the conclusion of the survey to provide a contact email to receive a summary of results. The contact information was not linked to their survey response. |
| Time/Date | The survey was conducted between 29th April 2020 and 17th September 2020 |
| Randomisation of items or questionnaires | The questions were not randomised or alternated for participants. |
| Adaptive questioning | Adaptive questioning was used to reduce the number of questions that would be relevant/irrelevant to each participant. |
| Number of Items | The number of items per page ranged from 1 – 15 with the average number of items per page being 6.82. |
| Number of screens (pages) | The number of screens was a maximum of 11, with a minimum of 7 depending on the previous answers for that participant. |
| Completeness check | Completeness check was not used for this survey as all responses were voluntary in nature |
| Review step | Participants were able to go back and change answers but not withdraw an answer. There was no final review of answers/submission. |
| Response rates | Unique site visitor | View rates/participations rates were not investigated. Only answered items were evaluated in results. |
| View rate (Ratio of unique survey visitors/unique site visitors) | Not applicable – unique site visitors was not calculated as the survey link was a direct link to the survey rather than the site |
| Participation rate (ratio of consented participants/unique page visitors) | Not applicable – Unique page visitors was not calculated. |
| Completion rate (ratio of users who finished the survey/users who consented) | 79.85% |
| Preventing multiple entries from the same individual | Cookies used | Cookies were not used to assign a unique user identifier |
| IP check | IP addressed were not used to identify duplicate entries |
| Log file analysis | No other techniques were used to analyse the log file for identification of multiple entries |
| Registration | Not applicable – this was an open survey |
| Analysis | Handling of incomplete questionnaires | Questionnaires completed as consent-only or with demographic-only data were not analysed. |
| Questionnaires submitted with an atypical timestamp | No timestamp was used to exclude questionnaires/answers. All answers were included in final analysis. |
| Statistical correction | No weighting of items or propensity scores have been used to adjust for the sample. |

**Appendix C – Free Text Response Coding Rules**

| Question | Existing Categories | New Categories |
| --- | --- | --- |
| Dominant arm/leg | - Where participants stated a timeframe, (e.g. was left/now right) was re-coded to their “current” preferred leg as this was the nature of the question - Where participants stated movements where they preferred different legs, if the movements were equally discussed e.g. “Left leg flex, Right leg turns” or “depends the movement” then they were re-coded to “Both/Unsure/Neither” category - Where participants used a word “mostly/predominantly/always” one leg with a caveat of a few movements, then they were re-coded to the side they indicated the overall predominance as this was the nature of the question |  |
| Body Region | - Where participants stated a more specific body part but the category already existed, participants were re-coded to that category (e.g. “big toe” was re-coded to “foot”) | - Thorax: included participants responses such as “ribs” “chest” - Tibia/Shin - Achilles |
| Acuity of Injury | - Re-coding was based on other responses given regarding the diagnosis of injury and the body region injured. Researchers used their expertise to ascertain whether the participant was describing an acute, gradual or exacerbation injury. Where there was uncertainty researchers did not re-code the response. - Where participants described differing acuities (e.g. both acute/gradual) these were re-coded based on the injury diagnosis.   - “Multiple subluxations led to dislocation” was re-coded to acute injury as this represents acute injuries with varying severity   - “I have hypermobile joints and my shoulder partially dislocated (has happened before but not for a long time)” was re-coded to acute, as the injury itself is acute, but they have volunteered information regarding their risk factors - Where participants described a single event causing the injury these were re-coded to acute e.g. e.g. “landed on it to hard” - Where participants stated that it was a “reinjury” they were re-coded to exacerbation/recurrence - Participants who stated “growth” were re-coded to Gradual/Overuse |  |
| Diagnosis | - Re-coding was based on other responses of body region and acuity and researchers’ expertise to determine the diagnosis being described by the participant. Where there was uncertainty, researchers did not re-code the response - Euphemisms/Synonyms used were re-coded to their corresponding category in the previous options e.g. muscle tear, pulled muscle were re-coded to sprain/strain, e.g. pinched nerve, re-coded to impingement - Where a slight variation of the pathology was described they were re-coded to the pathology best matching the description e.g. stress fracture was re-coded to fracture, subluxation/partial dislocation was re-coded to dislocation - Where participants used phrasing in their text response that notated uncertainty e.g. “never determined”, “unsure which”, “?possibly”, these were re-coded to “Unsure” | - Disc pathology: includes answers stating intervertebral discs such as “bulging disc”, “degeneration of disc”, “inflammation of disc” - Concussion - Cartilage pathology: includes “cartilage tear”, “cartilage separation” and also included where the specific type of cartilage was mentioned e.g. “labral tear” “meniscal tear” - Ganglion Cysts - Osgood-Schlatter disease - Anterior Knee conditions/Syndromes: includes patellofemoral joint syndrome, Fat pad impingement (where knee was the region) |
| At what time of year did this injury occur? |  | - End of season: includes participants who state that the injury occurred post competitions e.g. “End of the year, class after last comp”, “Early December, 5 days before skills exam.”, “After competition session before end of year performance.” |
| What contributed to the injury? Multiple factors could be selected. | - Where a participant reported increasing load with either calisthenics or another sport this was re-coded to “doing too many hours” - Where a participant had not warmed up properly due to other factors were also added to “not given enough warm up time”, e.g. where they wrote, “I was not warmed up properly”, “was not warm prior to stretching” - Where performers only specified “stage” this was not recoded to either stage/prop etc. or to this category due to the uncertainty of the nature of whether there was a mental or physical stage aspect to this. - Where participants had multiple text reasons, if they could not be recoded into the above categories they were also left in “other” | - Stage/prop/costume/apparatus element: e.g. stage curtain in the way etc. - Strength component: e.g where participants cited not having enough strength for a movement or not being well conditioned, or mentioned some aspect of strength/weakness - Partner/lift work - Age related component: e.g. too old or growth spurt mentioned - Technique: included either the performer mentioning the technique or how a movement was completed or about how a movement had been taught incorrectly. (where the teaching of strength or flexibility was mentioned these were left in other categories or recoded to strength/flexibility components as appropriate) - Accident/fall/slip - Overstretching - Competition element: e.g. nervous on stage, or mental component of performance - Other environmental factors (e.g. dust/slippery/temp) - Other intrinsic/congenital/previous injury: e.g. hypermobility - Fatigue |

Re-coding rules applicable for all questions:

- Where participants provided a text response that was applicable to an already provided option, these were re-coded to that option
- Where there was an obvious typo/spelling error this was re-coded or re-written with the correct spelling (e.g. year of injury 3017 was re-coded to 2017)
